# Supplementary material
Source: Elsevier journal article supplement (https://authors.library.caltech.edu/58736/4/mmc3.xlsx)
Supplement: mmc3 [file mmc3.xlsx]

## Sheet: Table S3a
	Tier:		1					2
	Clade:	Cntrl.	B	A	D	A	A	A	A	A	B	B
	Viruses:	MuLV	HxBC2.DG	BG505/T332N	T247-23	62357.14.D3.3489	Q842.d12	0330.v4.c3	3365.v2.c30	Q769_d22	REJO4541.67	YU2.DG
Serum:	7	<50	<50	<50	291	<50	<50	<50	<50	<50	<50	<50
	9	<50	<50	<50	2225	<50	<50	76	<50	<50	<50	<50
													CDRL3:	VL gene usage:
mAb:	19	>10	>10	>10	0.207	>10	>10	>10	>10	>10	X	>10	QQYET	Vk8-30*01
	20	>10	>10	>10	0.265	>10	>10	>10	>10	>10	>10	>10	QQYET
	21	>10	>10	>10	>10	2.244	>10	>10	>10	>10	>10	>10	QHYIT	Vk10-94*01
	22	>10	>10	>10	8.157	>10	>10	>10	>10	>10	>10	>10	QQYET
	23	>10	>10	>10	3.607	>10	>10	>10	>10	>10	>10	>10	QEYET
	24	>10	>10	>10	0.212	>10	>10	>10	>10	>10	>10	>10	QQYET
	GL	>10	>10	>10	1.569	>10	>10	>10	>10	>10	>10	>10	QQYET
	25	>8	>8	>8	5.094	>8	>8	>8	>8	>8	>8	>8	QQYET	Vk4-57-1*01
	26	>10	>10	>10	>10	>10	>10	>10	>10	>10	>10	>10	QQYST
	27	>10	>10	>10	8.965	>10	>10	>10	>10	>10	>10	>10	QQYSA
	28	>10	>10	>10	1.905	>10	>10	>10	>10	>10	>10	>10	QEYDT
	29	>10	>10	>10	0.967	>10	>10	>10	>10	>10	>10	>10	QQYET	Vk4-59*01
	30	>10	>10	7.681	0.448	0.694	>10	>10	>10	>10	>10	>10	QQYET
	31	>10	>10	>10	>10	>10	>10	>10	>10	>10	>10	>10	QQYSG	Vk4-57-1*01
	32	>10	>10	>10	>10	>10	>10	>10	>10	>10	>10	>10	QQYSG
	33	>10	>10	>10	5.436	8.453	>10	>10	>10	>10	>10	>10	QQWET	Vk4-72*01
	34	>10	>10	>10	1.072	>10	>10	>10	>10	>10	>10	>10	QQYET	Vk4-61*01

## Sheet: Table S3b
	Clade:	Cntrl.	A	D	A	A	A	B
	Viruses:	MuLV	BG505/T332N	T247-23	62357.14	Q842.d12	3365.v2.c30	YU2.DG
Serum:	7	<50	<50	291	<50	<50	<50	<50
	9	<50	<50	2225	<50	<50	<50	<50
									CDRL3:	VL gene usage:
mAb:	22	>25	>50	4.619	8.797	>25	>25	>25	QQYET	Vk10-94*01
	23	>25	>10	2.406	>10	>25	>25	>25	QEYET
	GL	>25	>50	1.152	1.913	>25	>50	>50	QQYET
